# Supplementary material
Source: HighWire-hosted journal article supplement (https://bmjopen.bmj.com/content/10/8/e039652)

## SUPPLEMENTARY MATERIAL

**Table S1.** Search strategies for meta-analysis of observational studies reporting the Incubation period of COVID-19.

| <b>Database</b>                                                                             | <b>Search strategy (publications accessible 1<sup>st</sup> Dec 2019-8th April 2020)</b>                                              |
|---------------------------------------------------------------------------------------------|--------------------------------------------------------------------------------------------------------------------------------------|
| Pubmed                                                                                      | ("Novel coronavirus" OR "SARS-CoV-2" OR "2019-nCoV" OR "COVID-19") AND ("incubation period" OR "incubation")                         |
| Cochrane                                                                                    | ("Novel coronavirus" OR "SARS-CoV-2" OR "2019-nCoV" OR "COVID-19") AND ("incubation period" OR "incubation")                         |
| Google Scholar                                                                              | ("Novel coronavirus" OR "SARS-CoV-2" OR "2019-nCoV" OR "COVID-19") AND ("incubation period" OR "incubation")                         |
| Embase                                                                                      | ("Novel coronavirus" OR "SARS-CoV-2" OR "2019-nCoV" OR "COVID-19") AND ("incubation period" OR "incubation")                         |
| <b>Preprint servers (i.e. preliminary reports of work that have not been peer-reviewed)</b> |                                                                                                                                      |
| medRxiv and bioRxiv                                                                         | Pre populated search:<br><a href="https://connect.medrxiv.org/relate/content/181">https://connect.medrxiv.org/relate/content/181</a> |

**Quality assessment scale – adapted from Newcastle-Ottawa quality assessment scale for cohort studies.****External validity**1) Representativeness of the study cohort

- a) No selection of cases based on age, sex or general health status, supported by descriptive statistics demonstrating comparability with overall population\*
- b) No selection of cases based on age, sex or general health status, not supported by descriptive statistics\*
- c) Cases are likely to be biased towards those with more severe COVID-19 symptoms due to selection process – e.g. records from hospitalised patients
- d) Cases are selected (e.g. based on age or sex) to represent a particular cohort of individuals
- e) No description of the derivation of the cohort

**Internal validity*****Exposure window***2) Ascertainment of exposure

- a) original data collected through interview \*
- b) travel period only \*
- c) secondary data (using publicly available reports)

3) Precision of the exposure window for cases used in final analysis

- a) only includes cases with a 1-day exposure window \*
- b) only includes cases with less than or equal to 3-day exposure window
- c) includes cases with a range of exposure windows but statistical methods are used to account for this
- d) includes cases with a range of exposure windows
- e) no description/not clear

***Outcome***4) Assessment of outcome (onset of symptoms)

- a) original data collected through interview \*
- b) no description/not clear

5) Precision of estimate of outcome

- a) Precise date \*
- b) Window
- c) no description/not clear

**Table S2** Quality assessment of final studies used in the meta-analysis of incubation period

| Study               | Quality assessment item category |   |   |   |   |
|---------------------|----------------------------------|---|---|---|---|
|                     | 1                                | 2 | 3 | 4 | 5 |
| Backer et al., 2020 | a                                | b | c | a | a |
| Lauer et al., 2020  | a                                | b | c | a | b |
| Li et al., 2020     | a                                | a | e | a | a |
| Bi et al., 2020     | a                                | a | c | a | a |
| Jiang et al., 2020  | b                                | c | e | b | c |
| Linton et al., 2020 | b                                | b | c | b | a |
| Zhang et al., 2020  | b                                | a | e | a | a |
| Ma et al., 2020     | b                                | c | b | b | a |
| Leung, 2020         | b                                | c | c | b | a |

**Figure S1** – Funnel plot of estimates of mu parameter of the lognormal distribution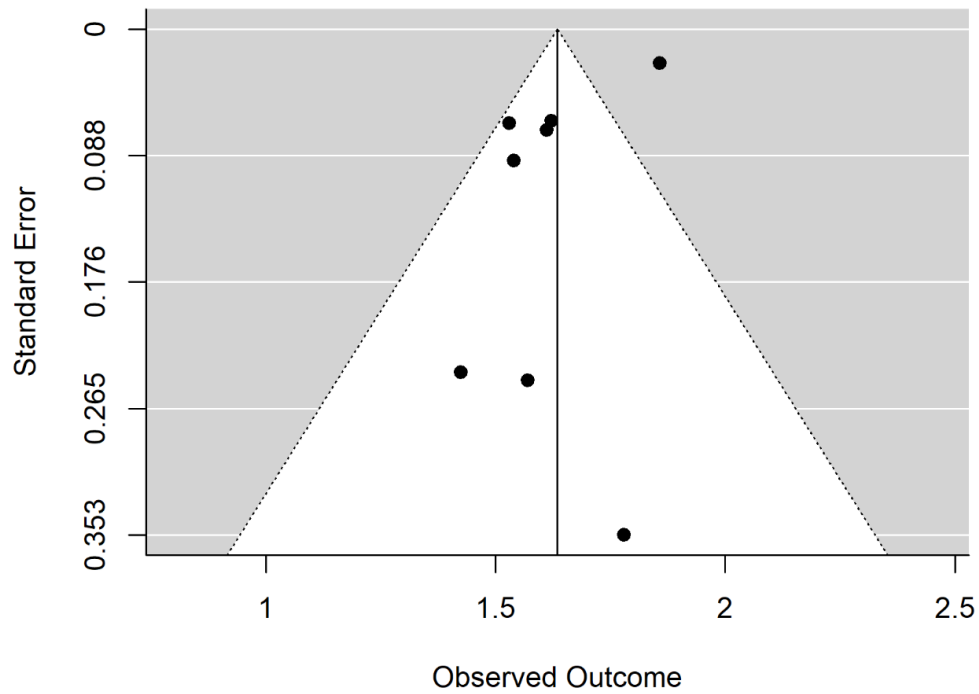

**Figure S2** – Funnel plot of the sigma parameter of the lognormal distribution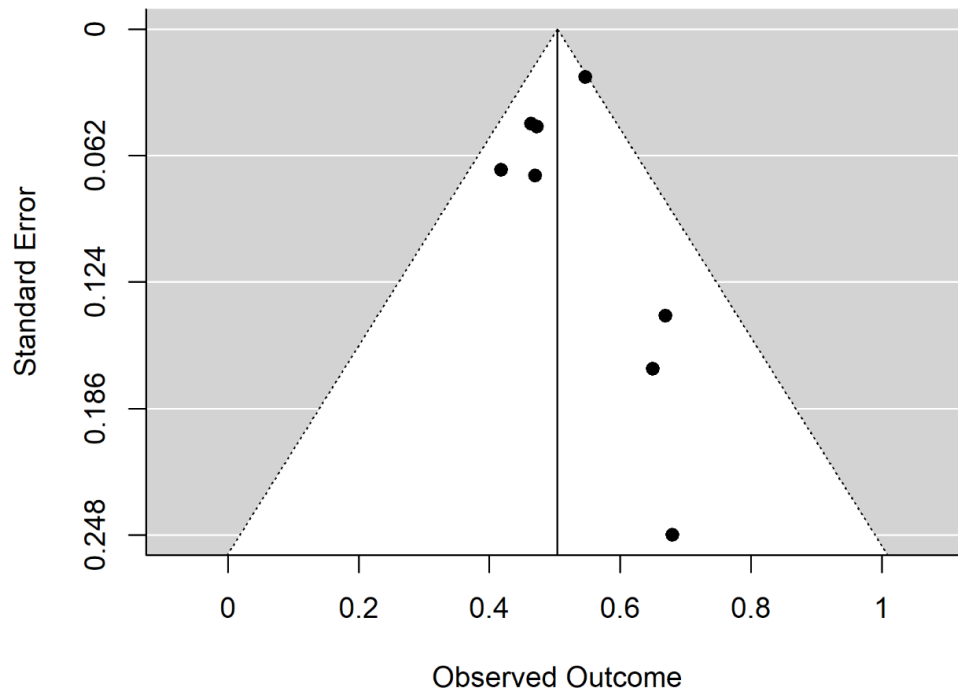

**Figure S3** – Incubation period (T1 + T3) in the context of other key parameters important for the transmission of COVID-19.

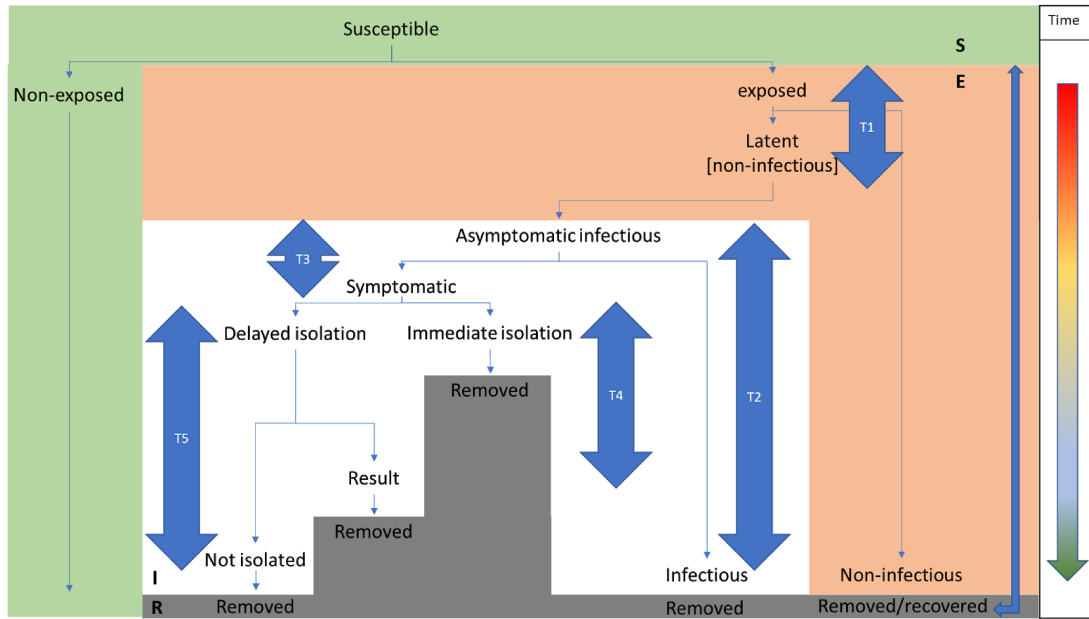

Supplement: inline-supplementary-material-1 [file inline-supplementary-material-1.pdf]
